# Supplementary material for: What Is Currently Known about Intramedullary Spinal Cord Abscess among Children? A Concise Review
Source: MDPI journal article supplement (doi:10.3390/jcm11154549), 2022-08-04
Supplement: s1 [file s1]

| No | Age [years] | Sex  | Onset    | Location of abscess | Inflam. | Symptoms                                   | Comorbidities and/or predisposing factors | Mechanism of infection | Pathogens                                                             | Neurosurgical management                                           | Pharmacological treatment                                                      | Outcome               | PMID     |
|----|-------------|------|----------|---------------------|---------|--------------------------------------------|-------------------------------------------|------------------------|-----------------------------------------------------------------------|--------------------------------------------------------------------|--------------------------------------------------------------------------------|-----------------------|----------|
| 1  | 1.00        | M    | acute    | T12-S3              | +       | exaggerated lower and upper limbs reflexes | Spina bifida, dermal sinus and/or tract   | Contiguous             | S. melliri, B. fragilis                                               | Myelotomy, dermal sinus/tract removal                              | ceftriaxone, vancomycin, metronidazole, meropenem                              | Died (cardiac arrest) | 23292742 |
| 2  | 1.33        | M    | acute    | Th1 downwards       | +       | ND (M)                                     | Dermal sinus and/or tract                 | Contiguous             | B-proteus, streptococcus                                              | Myelotomy, dermal sinus/tract removal                              | erythromycin, ampicillin, and sulphonamides                                    | Persistent ND         | 5800472  |
| 3  | 0.08        | N.D. | acute    | Conus               | +       | N.D.                                       | Low conus, dermal sinus and/or tract      | Contiguous             | P. mirabilis                                                          | Myelotomy                                                          | antibiotics (not specified)                                                    | Persistent ND         | 329455   |
| 4  | 11.00       | M    | chronic  | T8-L1               | -       | ND (M + S), pain, bladder dysfunction      | N.D.                                      | Cryptogenic            | Culture negative                                                      | Myelotomy, abscess capsule excision                                | N.D.                                                                           | Persistent ND         | 1394271  |
| 5  | 17.00       | M    | subacute | T11-L2              | +       | ND (M + S), pain, bladder dysfunction      | dermoid cyst without sinus tract          | Cryptogenic            | B. abortus                                                            | Myelotomy, dermoid cyst/abscess excision                           | ceftriaxone, tetracycline, and rifampicin                                      | Persistent ND         | 7843817  |
| 6  | 5.00        | M    | subacute | T10/11              | -       | ND (M), bladder & bowel dysfunction        | N.D.                                      | Cryptogenic            | Culture negative                                                      | Myelotomy                                                          | antibiotics (not specified)                                                    | Persistent ND         | 10771868 |
| 7  | 1.17        | M    | subacute | T12-L3              | +       | ND(M+S), discharge from sinus              | Dermal sinus and/or tract                 | Contiguous             | P. acnes, P. oralis, P. magnus, V. parvula, A. meyeri, B. ureolyticus | Laminectomy, purulent content drainage, dermal sinus/tract removal | vancomycin, ceftriaxone, ampicillin, metronidazole                             | Persistent ND         | 12586985 |
| 8  | 1.17        | N.D. | subacute | T8-10               | +       | ND(M+S)                                    | N.D.                                      | Cryptogenic            | Culture negative                                                      | Myelotomy                                                          | cephalosporin, antituberculosis drugs (not specified?), and methylprednisolone | Persistent ND         | 13680294 |
| 9  | 2.67        | M    | chronic  | T9-T11              | +       | ND (M+S)                                   | systemic infection                        | Hematogenous           | Culture negative                                                      | Myelotomy                                                          | vancomycin, ceftriaxone, amikacin, steroids (not specified?)                   | Persistent ND         | 17643248 |
| 10 | 0.67        | F    | acute    | T11-L5              | +       | ND (M)                                     | Low conus, dermal sinus and/or tract      | Contiguous             | St. aureus                                                            | Myelotomy, dermal sinus/tract removal                              | vancomycin, tazocin                                                            | Persistent ND         | 19172309 |
| 11 | 1.00        | F    | acute    | L1-S1               | +       | ND (M)                                     | Dermal sinus and/or tract                 | Contiguous             | St. aureus                                                            | Myelotomy, dermal sinus/tract removal                              | vancomycin, tazocin                                                            | Persistent ND         | 19172309 |
| 12 | 1.50        | M    | subacute | T5-T6               | +       | ND (M), bladder dysfunction                | Spina bifida, dermal sinus and/or tract   | Contiguous             | M. tuberculosis                                                       | Not performed                                                      | isoniazid, rifampicin, ethambutol, pyrazinamide, streptomycin                  | Persistent ND         | 23257833 |
| 13 | 1.00        | F    | subacute | T2-3                | +       | ND (M+S)                                   | Multiple attempts to                      | Cryptogenic            | Culture negative                                                      | Myelotomy                                                          | vancomycin, meropenem                                                          | Persistent ND         | 23559394 |

|    |       |   |          |          |   |                                       |                                                                   |              |                          |                                                                                                                     |                                                                                          |               |          |
|----|-------|---|----------|----------|---|---------------------------------------|-------------------------------------------------------------------|--------------|--------------------------|---------------------------------------------------------------------------------------------------------------------|------------------------------------------------------------------------------------------|---------------|----------|
|    |       |   |          |          |   |                                       | lumbar puncture                                                   |              |                          |                                                                                                                     |                                                                                          |               |          |
| 14 | 1.25  | M | subacute | T9-S2    | + | ND (M+S), bladder dysfunction         | Spina bifida, dermal sinus and/or tract                           | Contiguous   | E. sakazakii             | Dermal sinus/tract removal                                                                                          | meropenem, metronidazole, teicoplanin, crystalline penicillin, cefotaxime, dexamethasone | Persistent ND | 25099316 |
| 15 | 0.83  | F | subacute | T6/7     | + | ND (M), pus leakage                   | Dermal sinus and/or tract                                         | Contiguous   | Finegoldia magna         | laminectomy, evacuation of the abscess, dermal sinus excision, samples for histopathology and microbiological tests | meropenem, ceftriaxone, and metronidazole                                                | Persistent ND | 30738869 |
| 16 | 3.42  | M | N.D.     | C4-Th4   | + | ND (M)                                | N.D.                                                              | Cryptogenic  | Gram-positive diplococci | Laminectomy                                                                                                         | penicillin, sulphadimidine, chloramphenicol                                              | Persistent ND | 13967857 |
| 17 | 15.00 | F | chronic  | T7-10    |   | ND (M + S)                            | N.D.                                                              | Cryptogenic  | N.D.                     | Myelotomy                                                                                                           | penicillin, streptomycin, and methylprednisolone                                         | Residual ND   | 5457648  |
| 18 | 15.00 | M | acute    | C2-Th2   | + | ND (M)                                | Dermal sinus and/or tract                                         | Contiguous   | P. mirabilis             | Myelotomy, dermal sinus/tract removal                                                                               | methicillin, chloramphenicol                                                             | Residual ND   | 471207   |
| 19 | 7.00  | M | chronic  | T7/8     | + | ND (M+S), bladder dysfunction         | Interstitial infiltration of the left lung                        | Hematogenous | Culture negative         | Myelotomy                                                                                                           | isoniazid, rifampin, streptomycin, and methylprednisolone                                | Residual ND   | 8882702  |
| 20 | 3.00  | M | acute    | T12-S1   | + | ND (M+S)                              | N.D.                                                              | Cryptogenic  | Culture negative         | Myelotomy, abscess capsule excision                                                                                 | N.D.                                                                                     | Residual ND   | 11275786 |
| 21 | 1.00  | F | chronic  | T12-S1   | + | ND (M+S), bladder & bowel dysfunction | Dermal sinus and/or tract, erythema, meconium aspiration syndrome | Contiguous   | Culture negative         | Myelotomy                                                                                                           | Cefotaxime, panipenem, and y-globulin                                                    | Residual ND   | 12422041 |
| 22 | 0.08  | F | acute    | Lx       | - | ND (M), pus leakage                   | Dermal sinus and/or tract                                         | Contiguous   | N.D.                     | Puncture, myelotomy                                                                                                 | antibiotics (not specified)                                                              | Residual ND   | 12944707 |
| 23 | 1.50  | F | acute    | C6-Conus | + | ND(M), bladder & bowel dysfunction    | Small cutaneous nevus                                             | Contiguous   | P. mirabilis, E. coli    | Myelotomy                                                                                                           | clindamycin, cefotaxime, meropenem, trimethoprim                                         | Residual ND   | 17877274 |
| 24 | 2.00  | F | acute    | C5-T1    | + | ND (M)                                | Cervical dimple and dermal sinus and/or tract                     | Contiguous   | St. aureus               | Myelotomy, dermal sinus/tract removal                                                                               | vancomycin, tazocin                                                                      | Residual ND   | 19172309 |

|    |      |   |          |                                                             |      |                                                    |                                                                                                         |              |                                            |                                                                              |                                                                            |                                   |          |
|----|------|---|----------|-------------------------------------------------------------|------|----------------------------------------------------|---------------------------------------------------------------------------------------------------------|--------------|--------------------------------------------|------------------------------------------------------------------------------|----------------------------------------------------------------------------|-----------------------------------|----------|
| 25 | 6.00 | M | chronic  | C5-T11                                                      | N.D. | ND (M+S),<br>bladder<br>dysfunction                | scoliotic<br>deformity                                                                                  | Cryptogenic  | St. aureus                                 | Myelotomy                                                                    | ceftriaxone, amikacin                                                      | Residual ND                       | 22138908 |
| 26 | 1.50 | F | chronic  | T4-L5                                                       | +    | ND(M+S),<br>bladder<br>dysfunction                 | Dermal sinus<br>and/or tract                                                                            | Contiguous   | E. coli, P. aeruginosa                     | Myelotomy                                                                    | antibiotics (not<br>specified)                                             | Residual ND                       | 24470811 |
| 27 | 1.25 | F | N.D.     | Brainstem-<br>T8                                            | +    | ND (M)                                             | Dermal sinus<br>and/or tract,<br>septic state                                                           | Contiguous   | Corynebacterium and<br>peptococcus species | Myelotomy, dermal<br>sinus/tract removal                                     | Cephalosporin,<br>ciprofloxacin,<br>vancomycin, colistin,<br>and meropenem | Residual ND                       | 26458220 |
| 28 | 1.25 | F | chronic  | L1-S2 -><br>holocord<br>(after first<br>surgery)            | N.D. | ND (M+S),<br>bladder<br>dysfunction                | Dermal sinus<br>and/or tract                                                                            | Contiguous   | E. coli                                    | Myelotomy, dermoid<br>cyst excision and<br>dermal sinus/tract<br>removal     | N.D.                                                                       | Residual ND                       | 29185056 |
| 29 | 1.00 | M | acute    | C7-Th2                                                      | +    | ND(M), visible<br>abscess (over<br>scapula)        | Dermal sinus<br>and/or tract                                                                            | Contiguous   | Culture negative                           | Myelotomy, abscess<br>capsule excision                                       | antibiotics (not<br>specified)                                             | Residual ND                       | 29269365 |
| 30 | 4.00 | M | chronic  | Th10-S1                                                     | +    | ND (M+S),<br>bladder &<br>bowel<br>dysfunction     | Dermal sinus<br>and/or tract,<br>lumbosacral<br>meningocele<br>(state after<br>prophylactic<br>surgery) | Contiguous   | E. coli                                    | Myelotomy                                                                    | cefotaxime,<br>vancomycin                                                  | Residual ND                       | 10361972 |
| 31 | 2.25 | F | acute    | T10-L1                                                      | +    | ND (M), pain,<br>bladder &<br>bowel<br>dysfunction | Uncertain                                                                                               | Cryptogenic  | Culture negative                           | Myelotomy                                                                    | sulphadimidine,<br>penicillin, and<br>cortisone                            | Residual ND                       | 13967857 |
| 32 | 3.00 | F | subacute | Cervicomed<br>ullary-Upper<br>lumbar                        | +    | ND (M)                                             | Dermal sinus<br>and/or tract                                                                            | Contiguous   | St. aureus                                 | Dermal sinus/tract<br>removal, pus<br>aspiration                             | antibiotics (not<br>specified)                                             | Residual ND                       | 9127042  |
| 33 | 3.00 | M | subacute | T10-L5                                                      | +    | ND (M)                                             | Spinal lipoma,<br>lipomeningocele                                                                       | Cryptogenic  | Culture negative                           | Myelotomy                                                                    | antibiotics (not<br>specified)                                             | Residual ND                       | 27857795 |
| 34 | 4.50 | M | subacute | T1-3                                                        | +    | ND (M + S),<br>bladder<br>dysfunction              | Previous<br>infection<br>(pulmonary<br>infection)                                                       | Hematogenous | B. fusiformis                              | Myelotomy                                                                    | Streptomycin,<br>penicillin                                                | Complete<br>neurological recovery | 13212422 |
| 35 | 2.00 | F | acute    | L2-L5 [L2-L3<br>with<br>extramedull<br>ary part: L3-<br>L5] | -    | ND(M), pain,<br>bladder &<br>bowel<br>dysfunction  | Dermal sinus<br>and/or tract,<br>epidermoid<br>cyst, spina<br>bifida occulta                            | Contiguous   | E. coli, P. mirabilis, B.<br>fragilis      | Myelotomy,<br>epidermoid tumor<br>excision and dermal<br>sinus/tract removal | ampicillin,<br>metronidazole                                               | Complete<br>neurological recovery | 1738439  |

|    |       |   |          |            |   |                                                             |                                                                 |              |                                                      |                                                           |                                                                                              |                                   |          |
|----|-------|---|----------|------------|---|-------------------------------------------------------------|-----------------------------------------------------------------|--------------|------------------------------------------------------|-----------------------------------------------------------|----------------------------------------------------------------------------------------------|-----------------------------------|----------|
| 36 | 2.00  | F | acute    | L1-L3      | + | ND (M)                                                      | Spina bifida,<br>dermal sinus<br>and/or tract                   | Contiguous   | E. coli, Bacteroides<br>fragilis, P. mirabilis       | Myelotomy                                                 | antibiotics (not<br>specified)                                                               | Complete<br>neurological recovery | 8279336  |
| 37 | 5.00  | M | acute    | Th8-Th9    | + | ND (M + S),<br>bladder<br>dysfunction                       | Diarrhoea for<br>3 weeks                                        | Cryptogenic  | Culture negative                                     | Myelotomy                                                 | amoxicillin,<br>ceftazidime                                                                  | Complete<br>neurological recovery | 7638666  |
| 38 | 15.00 | F | acute    | T11/12     | + | ND (M+S),<br>pain                                           | Brucella<br>infection                                           | Hematogenous | Brucella                                             | Myelotomy                                                 | streptomycin,<br>doxycycline,<br>rifampicin,<br>ceftriaxone, and<br>methylprednisolone       | Complete<br>neurological recovery | 12139575 |
| 39 | 7.00  | M | acute    | Th7        | + | ND (M+S),<br>pain, bladder<br>dysfunction                   | Tuberculosis                                                    | Hematogenous | M. tuberculosis                                      | Hemilaminectomy,<br>pus aspiration                        | isoniazid, rifampicin,<br>streptomycin, and<br>methylprednisolone                            | Complete<br>neurological recovery | 12815372 |
| 40 | 4.00  | M | subacute | T10        | + | ND (M+S)                                                    | Previous<br>infection<br>(upper<br>respiratory<br>tract)        | Cryptogenic  | M. saproscopicus                                     | Myelotomy                                                 | teicoplanin,<br>sulbactam, ampicillin,<br>ornidazole, and<br>dexamethasone<br>(preoperative) | Complete<br>neurological recovery | 15338340 |
| 41 | 0.17  | M | subacute | Holocord   | - | ND (M),<br>discharge<br>from sinus,<br>bowel<br>dysfunction | Dermal sinus<br>and/or tract                                    | Contiguous   | St. aureus                                           | pus aspiration,<br>dermal sinus and/or<br>tract removal   | cloxacillin                                                                                  | Complete<br>neurological recovery | 16619639 |
| 42 | 1.50  | M | subacute | Holocord   | + | ND (M),<br>bladder<br>dysfunction                           | Dermal sinus<br>and/or tract                                    | Contiguous   | N.D.                                                 | Myelotomy                                                 | antibiotics (not<br>specified)                                                               | Complete<br>neurological recovery | 17595507 |
| 43 | 1.42  | M | acute    | T12-L5     | + | ND(M+S),<br>bladder &<br>bowel<br>dysfunction               | Dermal sinus<br>and/or tract                                    | Contiguous   | Staphylococcus,<br>Peptostreptococcus,<br>Prevotella | Myelotomy                                                 | vancomycin,<br>ceftriaxone,<br>metronidazole                                                 | Complete<br>neurological recovery | 17675033 |
| 44 | 7.00  | M | subacute | Medulla-C4 | + | meningitis, no<br>ND                                        | Previous<br>infection<br>(systemic)                             | Cryptogenic  | St. aureus                                           | N/A                                                       | ceftriaxone,<br>vancomycin, and<br>dexamethasone                                             | Complete<br>neurological recovery | 18350307 |
| 45 | 6.00  | M | acute    | Medulla-L2 | + | ND (M+S),<br>bladder<br>dysfunction                         | Previous<br>meningitis,<br>dermal sinus<br>and/or tract         | Contagious   | Culture negative                                     | Conus puncture,<br>removal of derma<br>sinus and/or tract | Cefotaxime,<br>metronidazole,<br>vancomycin                                                  | Complete<br>neurological recovery | 18660476 |
| 46 | 5.00  | M | acute    | L1-L5      | + | ND(M),<br>bladder &<br>bowel<br>dysfunction                 | Mild thoraco-<br>lumber<br>scoliosis and<br>upper anal<br>cleft | Unclear      | St. aureus                                           | Laminectomy                                               | vancomycin                                                                                   | Complete<br>neurological recovery | 19172309 |

|    |       |   |          |            |   |                                   |                                                                         |              |                                   |                                                                |                                                                                                                |                                   |          |
|----|-------|---|----------|------------|---|-----------------------------------|-------------------------------------------------------------------------|--------------|-----------------------------------|----------------------------------------------------------------|----------------------------------------------------------------------------------------------------------------|-----------------------------------|----------|
| 47 | 1.33  | M | subacute | C2-S1      | + | ND (M),<br>bladder<br>dysfunction | Dermal sinus<br>and/or tract                                            | Contiguous   | P. oralis, P.<br>asaccharolyticus | Laminectomy,<br>abscess drainage,<br>dermal sinus<br>resection | ceftriaxone,<br>metronidazole,<br>vancomycin,<br>cefotaxime, steroid<br>bolus                                  | Complete<br>neurological recovery | 21310342 |
| 48 | 5.00  | M | subacute | T11-L1     | + | bladder<br>dysfunction,<br>pain   | bladder<br>dysfunction                                                  | Hematogenous | M. tuberculosis                   | Myelotomy                                                      | rifampicin, isoniazid,<br>ethambutol, and<br>pyrazinamide                                                      | Complete<br>neurological recovery | 22251511 |
| 49 | 5.00  | F | acute    | T12- L1    | + | ND (M+S)                          | N.D.                                                                    | Cryptogenic  | N/A                               | Drainage                                                       | ceftriaxone,<br>cloxacillin, amikacin,<br>prednisolone                                                         | Complete<br>neurological recovery | 22253156 |
| 50 | 0.75  | M | N.D.     | C4-C6      | + | ND (M)                            | Dermal sinus<br>and/or tract                                            | Contiguous   | P. mirabilis                      | Myelotomy, dermal<br>sinus/tract removal                       | Ceftriaxone,<br>Claritromycin                                                                                  | Complete<br>neurological recovery | 23907309 |
| 51 | 17.00 | M | subacute | Medulla-T3 | + | ND(M)                             | Trauma, spinal<br>injury, dermal<br>abrasion                            | Contiguous   | M. hominis                        | Myelotomy                                                      | vancomycin,<br>moxifloxacin,<br>doxycycline,<br>moxifloxacin,<br>piperacillin,<br>tazobactam, and<br>meropenem | Complete<br>neurological recovery | 24856879 |
| 52 | 0.33  | F | chronic  | T11-S4     | + | ND(M),<br>bladder<br>dysfunction  | Spina bifida,<br>low conus,<br>dermal sinus<br>and/or tract             | Cryptogenic  | M. tuberculosis                   | Myelotomy, dermal<br>sinus/tract removal                       | anti-tubercular<br>treatment (not<br>specified)                                                                | Complete<br>neurological recovery | 25878753 |
| 53 | 2.00  | M | acute    | Holocord   | + | ND (M)                            | Septic shock,<br>dermal sinus<br>and/or tract                           | Hematogenous | P. mirabilis                      | Laminectomy,<br>drainage, dermal<br>sinus/tract removal        | N.D.                                                                                                           | Complete<br>neurological recovery | 26960264 |
| 54 | 0.83  | F | subacute | Holocord   | + | ND (M),<br>bladder<br>dysfunction | Dermal sinus<br>and/or tract                                            | Contiguous   | Culture negative                  | Pyomyelia drainage,<br>dermal sinus and/or<br>tract removal    | vancomycin,<br>meropenem,<br>ceftriaxone                                                                       | Complete<br>neurological recovery | 29497549 |
| 55 | 1.00  | M | subacute | Holocord   | + | ND (M),<br>bladder<br>dysfunction | dermoid cyst,<br>recurrent<br>urinary tract<br>infections               | Contiguous   | E. coli                           | Partial laminectomy,<br>abscess irrigation                     | Ceftriaxone,<br>metronidazole,<br>amikacin,<br>carbapenem                                                      | Complete<br>neurological recovery | 27184560 |
| 56 | 10.00 | F | acute    | C2-C6      | + | ND (M)                            | N.D.                                                                    | Cryptogenic  | S. viridans                       | Myelotomy                                                      | antibiotics (not<br>specified)                                                                                 | Complete<br>neurological recovery | 29938303 |
| 57 | 17.00 | M | acute    | T5-12      | + | ND (M+S)                          | Maxillary sinus<br>abscess,<br>bronchiectasis,<br>chronic<br>bronchitis | Hematogenous | S. intermedius                    | N.D.                                                           | ceftriaxone,<br>vancomycin,<br>ampicillin,<br>meropenem, and<br>methylprednisolone                             | Complete<br>neurological recovery | 33246901 |

|    |      |   |          |            |   |                                              |                                                                                           |              |                                     |                                                                                                 |                                                                                     |                                |          |
|----|------|---|----------|------------|---|----------------------------------------------|-------------------------------------------------------------------------------------------|--------------|-------------------------------------|-------------------------------------------------------------------------------------------------|-------------------------------------------------------------------------------------|--------------------------------|----------|
| 58 | 2.00 | M | chronic  | L2-L4      | + | ND(M)                                        | Dermal sinus and/or tract                                                                 | Contiguous   | E. coli                             | Firstly: laminectomy and open biopsy. Then, second laminectomy, drainage                        | ceftriaxone                                                                         | Complete neurological recovery | 34124280 |
| 59 | 0.05 | F | subacute | L3-5       | + | bladder & bowel dysfunction                  | Retained medullary cord, dermal sinus and/or tract                                        | Contiguous   | S. anginosus, P. bivia, E. faecalis | laminotomy L3-L5, durotomy, resection of C-LS as a column, rostral incision, and pus irrigating | ampicillin, cefotaxime, vancomycin, meropenem, linezolid, and immunoglobulin (i.v.) | Complete neurological recovery | 35242420 |
| 60 | 3.00 | F | N.D.     | C5-6       | - | ND (M)                                       | Dermal sinus and/or tract                                                                 | Contiguous   | Culture negative                    | dermal sinus dissection, sampling for culturing and for biopsy                                  | antibiotics (not specified)                                                         | Complete neurological recovery | 32632578 |
| 61 | 1.33 | F | N.D.     | C4         | + | nonspecific                                  | Dermal sinus and/or tract                                                                 | Contiguous   | Propionibacterium species           | dermal sinus excision, sampling for culturing and for biopsy                                    | antibiotics (not specified)                                                         | Complete neurological recovery | 32632578 |
| 62 | 1.25 | F | chronic  | T10-Sx     | + | ND (M+S), bladder & bowel dysfunction        | Spina bifida, tethered cord, dermal sinus and/or tract (state after prophylactic surgery) | Contiguous   | E. faecalis                         | Myelotomy                                                                                       | cefotaxime, amoxicillin, and vancomycin                                             | Complete neurological recovery | 10361972 |
| 63 | 3.60 | M | acute    | C5-T2      | + | irritability, no other neurological findings | Tuberculosis                                                                              | Hematogenous | M. tuberculosis                     | Antibiotics (not specified)                                                                     | N.D.                                                                                | N.D.                           | 17987300 |
| 64 | 4.00 | M | chronic  | T6 - Conus | + | ND (M)                                       | Tuberculosis                                                                              | Hematogenous | M. tuberculosis                     | Myelotomy                                                                                       | antibiotics (not specified)                                                         | N.D.                           | 22837784 |

**Supplementary Table S1.** The basic information about published cases of paediatric intramedullary spinal cord abscesses. Legend: N.D. - no data, Inflamm. - inflammation signs/parameters; Sex: F - female, M - male; Location of abscess: C - cervical, L - lumbar, S -sacral, T - thoracic; Symptoms: ND - neurological deficits, ND (M) - motor neurological deficits, ND (M + S) - motor and sensory neurological deficits, ND (S) - sensory neurological deficits.
